# Supplementary material
Source: PubMed Central journal article supplement (PMC4028334)
Supplement: auto-9-1750-s01.pdf [file auto-9-1750-s01.pdf]

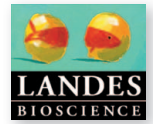

## **Supplemental Material to:**

**Seok Min Jin, Richard J Youle**

**The accumulation of misfolded proteins in the mitochondrial matrix is sensed by PINK1 to induce PARK2/ Parkin-mediated mitophagy of polarized mitochondria**

**Autophagy 2013; 9(11)**

**<http://dx.doi.org/10.4161/auto.26122>**

**[www.landesbioscience.com/journals/autophagy/article/26122](http://www.landesbioscience.com/journals/autophagy/article/26122)**

# Supplementary Fig.1

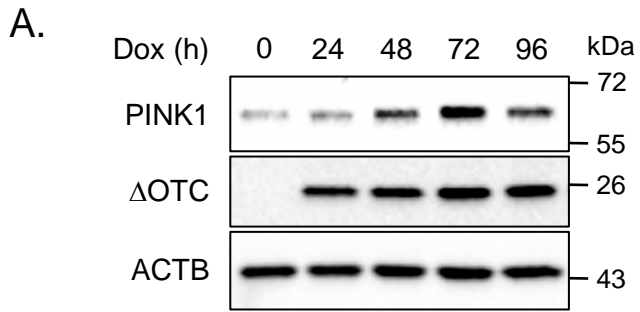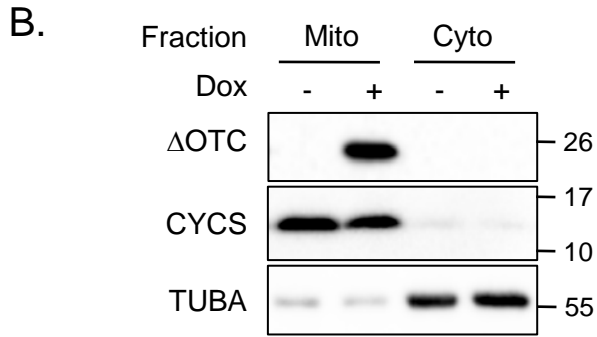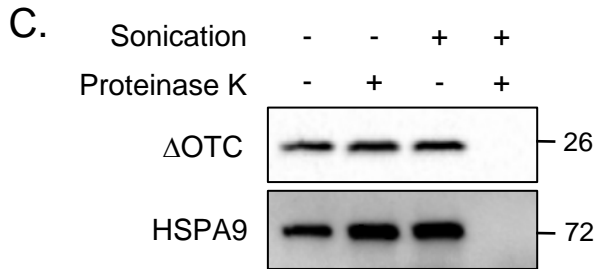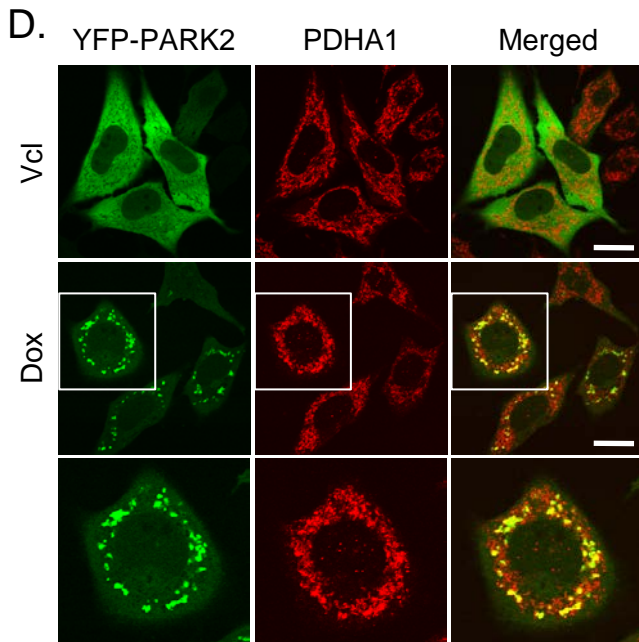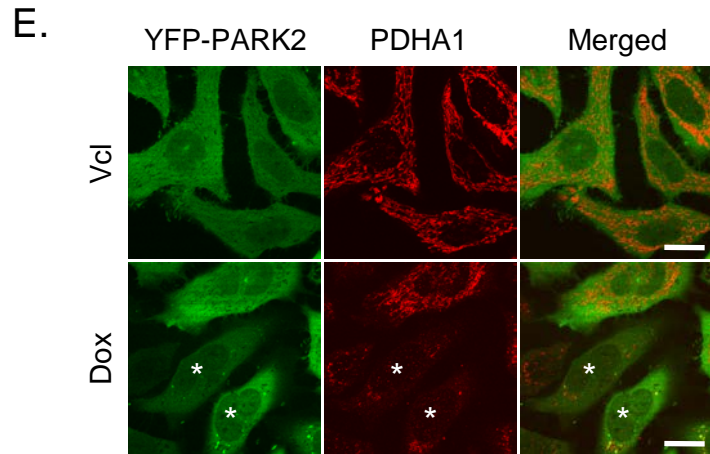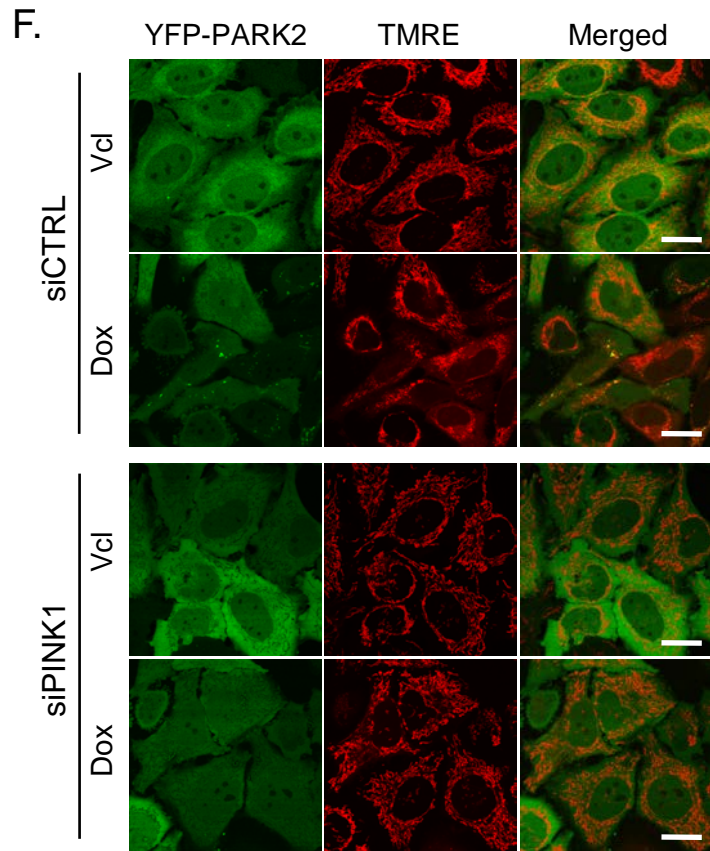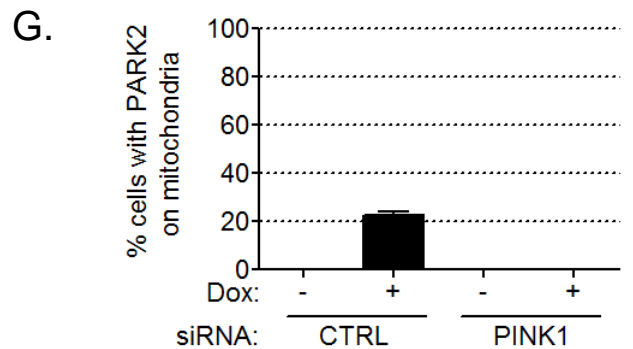

# Supplementary Fig.2

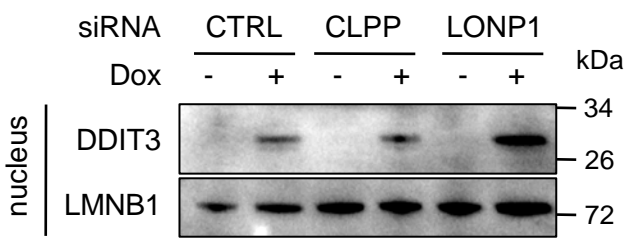

# Supplementary Fig.3

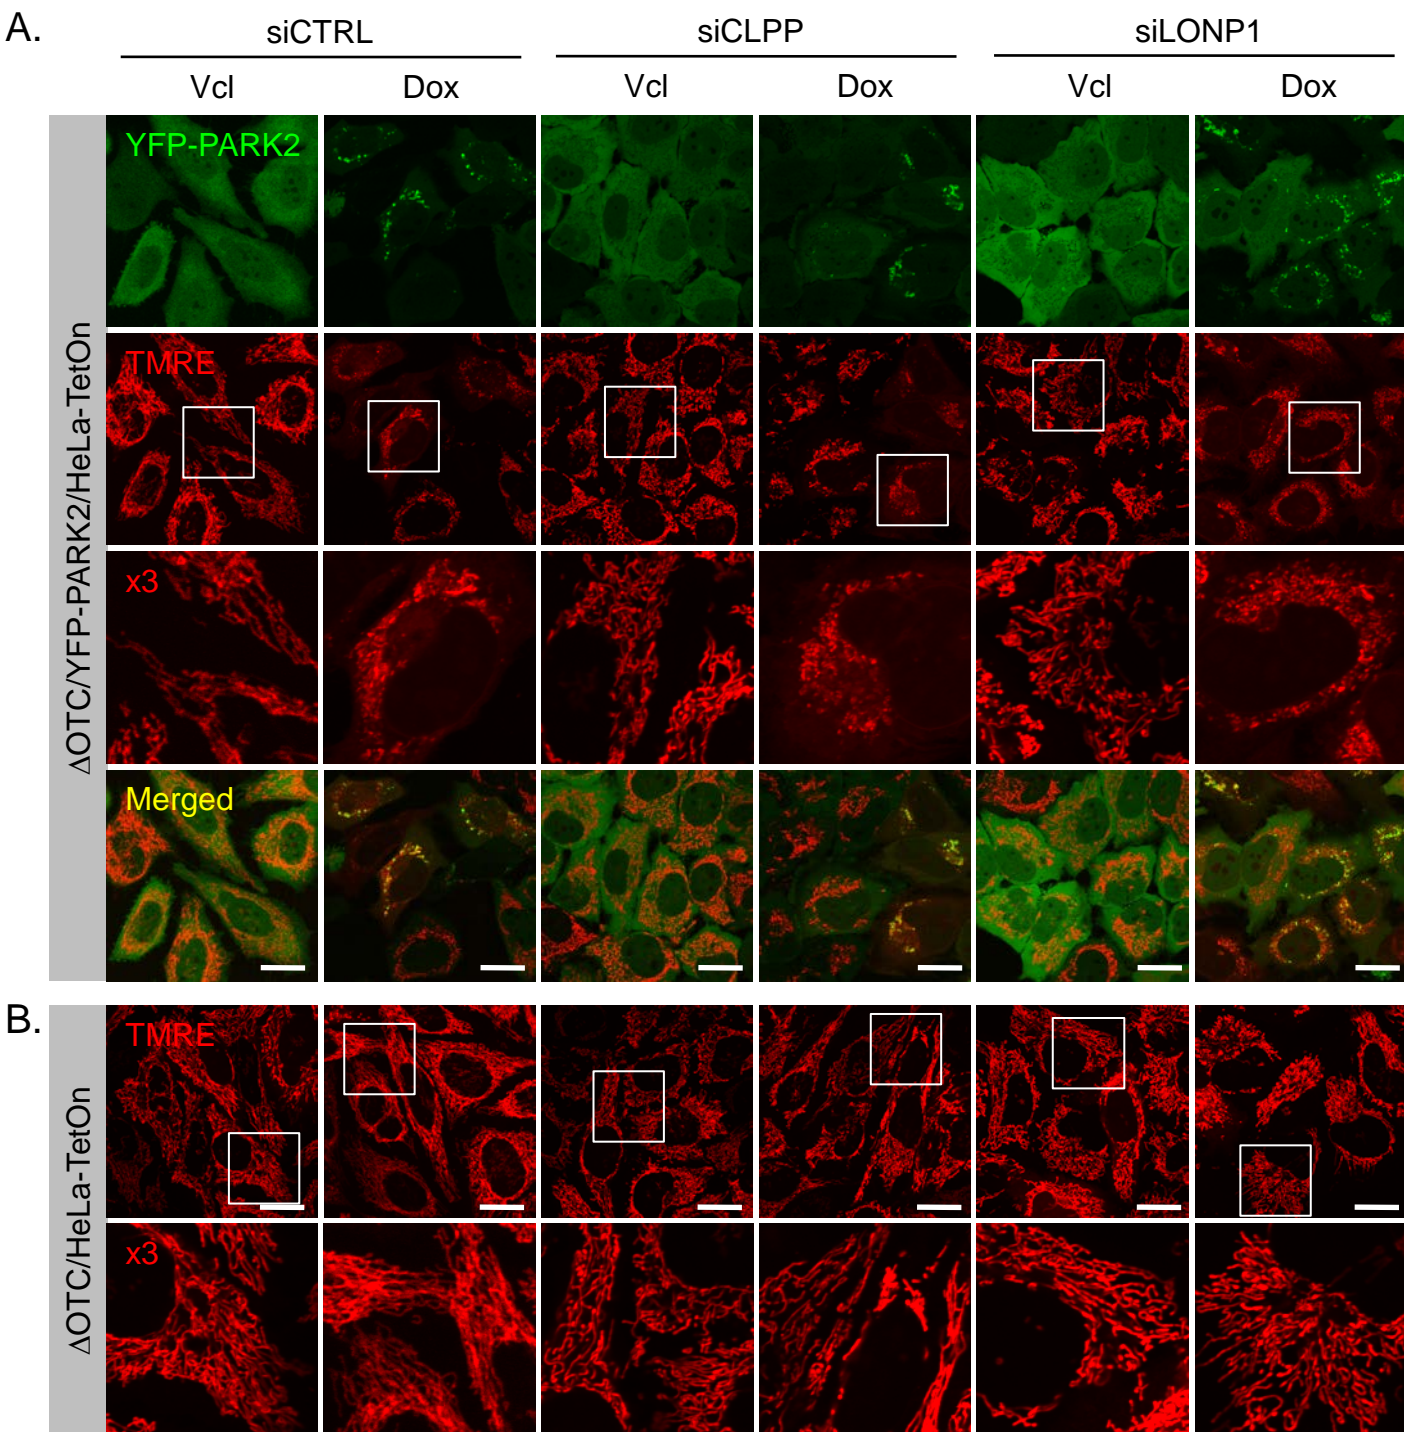

1 **Figure S1.**  $\Delta$ OTC expression in  $\Delta$ OTC/HeLa-TetOn stable cell line induces PINK1 accumulation,  
2 PINK1-dependent PARK2 translocation and mitophagy. (A) Time course of PINK1 and  $\Delta$ OTC  
3 expression in the  $\Delta$ OTC/HeLa-TetOn cell line following addition of Dox (1  $\mu$ g/ml). ACTB served as  
4 a loading control. (B)  $\Delta$ OTC/HeLa-TetOn cells were treated with Dox (1  $\mu$ g/ml) for 72 h and  
5 fractionated as described in Materials and Methods. Twenty  $\mu$ g of each fraction was analyzed by  
6 western blotting with the indicated antibodies. (C) Aliquots of mitochondrial fraction from (B). (D  
7 and E) PARK2 translocation (D) and mitophagy (E) in the  $\Delta$ OTC/YFP-PARK2/HeLa-TetOn stable  
8 cell line. Cells were treated with Dox (1  $\mu$ g/ml) for 72 h for PARK2 translocation (D) and 96 h for  
9 mitophagy (E) and immunostained with anti-PDHA1 antibody as described in Materials and  
10 Methods. Scale bars, 20  $\mu$ m. In (B), White boxes in the middle panel were magnified in the  
11 bottom panel. (F and G)  $\Delta$ OTC/YFP-PARK2/HeLa-TetOn stable cells were transfected with  
12 nontargeting control siRNA (siCTRL) or *PINK1* siRNA (siPINK1) for 24 h, treated with Dox (1  
13  $\mu$ g/ml) for 72 h, and analyzed for PARK2 translocation. Scale bars, 20  $\mu$ m (F).

14

15 **Figure S2.** The knockdown of *CLPP* or *LONP1* without  $\Delta$ OTC expression does not induce DDIT3  
16 expression.  $\Delta$ OTC/HeLa-TetOn stable cells were transfected with nontargeting control (CTRL),  
17 *CLPP*, or *LONP1* siRNAs. After 24 h, cells were treated with Dox (1  $\mu$ g/ml) for 72 h and  
18 fractionated. The level of DDIT3 in the nuclear fraction was analyzed by western blotting. LMNB1  
19 was used as a loading control.

20

21 **Figure S3.** Mitochondrial fragmentation upon  $\Delta$ OTC expression requires PARK2. (A and B)  
22  $\Delta$ OTC/YFP-PARK2/HeLa-TetOn (A),  $\Delta$ OTC/HeLa-TetOn (B) or stable cell lines were transfected  
23 with nontargeting control (CTRL), *CLPP*, or *LONP1* siRNAs. After 24 h, cells were treated with  
24 Dox (1  $\mu$ g/ml) for 72 h, stained with TMRE for 30 min, and imaged by confocal microscopy. Scale  
25 bars, 20  $\mu$ m. White boxes were 3-fold magnified in the next panel.
